# Supplementary material for: Perceived poverty and health, and their roles in the poverty-health vicious cycle: a qualitative study of major stakeholders in the healthcare setting in Hong Kong
Source: Springer Nature journal article supplement (doi:10.1186/s12939-020-1127-7), 2020-01-28
Supplement: MOESM1 [file 17603066]

**Additional Table 1. Basic characteristics of respondents in focus group interviews**

|                                 | Social workers (n=8) | Chronically-ill patients (n=8) | Older adults (n=6) | Primary care doctors (n=7) | Informal caregivers (n=10) |
|---------------------------------|----------------------|--------------------------------|--------------------|----------------------------|----------------------------|
|                                 | n (%)                | n (%)                          | n (%)              | n (%)                      | n (%)                      |
| <i>Age group</i>                |                      |                                |                    |                            |                            |
| Below 30 years                  | 4 (50.0%)            | 0 (0.0%)                       | 0 (0.0%)           | 0 (0.0%)                   | 0 (0.0%)                   |
| 30-39 years                     | 1 (12.5%)            | 0 (0.0%)                       | 0 (0.0%)           | 7 (100.0%)                 | 1 (10.0%)                  |
| 40-49 years                     | 2 (25.0%)            | 1 (12.5%)                      | 0 (0.0%)           | 0 (0.0%)                   | 5 (50.0%)                  |
| 50-59 years                     | 0 (0.0%)             | 4 (50.0%)                      | 0 (0.0%)           | 0 (0.0%)                   | 2 (20.0%)                  |
| 60-69 years                     | 0 (0.0%)             | 3 (37.5%)                      | 4 (66.7%)          | 0 (0.0%)                   | 1 (10.0%)                  |
| 70 years or above               | 0 (0.0%)             | 0 (0.0%)                       | 2 (33.3%)          | 0 (0.0%)                   | 0 (0.0%)                   |
| Missing                         | 1 (12.5%)            | 0 (0.0%)                       | 0 (0.0%)           | 0 (0.0%)                   | 1 (10.0%)                  |
| <i>Sex</i>                      |                      |                                |                    |                            |                            |
| Female                          | 4 (50.0%)            | 4 (50.0%)                      | 2 (33.3%)          | 3 (42.9%)                  | 9 (100.0%)                 |
| Male                            | 4 (50.0%)            | 4 (50.0%)                      | 4 (66.7%)          | 4 (57.1%)                  | 0 (0.0%)                   |
| Missing                         | 0 (0.0%)             | 0 (0.0%)                       | 0 (0.0%)           | 0 (0.0%)                   | 1 (10.0%)                  |
| <i>Education level</i>          |                      |                                |                    |                            |                            |
| Primary level or below          | 0 (0.0%)             | 5 (62.5%)                      | 4 (66.7%)          | 0 (0.0%)                   | 4 (40.0%)                  |
| Secondary level                 | 0 (0.0%)             | 3 (37.5%)                      | 1 (16.7%)          | 0 (0.0%)                   | 4 (40.0%)                  |
| Tertiary level                  | 8 (100.0%)           | 0 (0.0%)                       | 1 (16.7%)          | 7 (100.0%)                 | 1 (10.0%)                  |
| Missing                         | 0 (0.0%)             | 0 (0.0%)                       | 0 (0.0%)           | 0 (0.0%)                   | 1 (10.0%)                  |
| <i>Economic activity status</i> |                      |                                |                    |                            |                            |
| Employee                        | 8 (100.0%)           | 0 (0.0%)                       | 1 (16.7%)          | 7 (100.0%)                 | 0 (0.0%)                   |
| Self-employed                   | 0 (0.0%)             | 0 (0.0%)                       | 0 (0.0%)           | 0 (0.0%)                   | 1 (10.0%)                  |
| Non-employed                    | 0 (0.0%)             | 2 (25.0%)                      | 0 (0.0%)           | 0 (0.0%)                   | 0 (0.0%)                   |
| Retired                         | 0 (0.0%)             | 2 (25.0%)                      | 4 (66.7%)          | 0 (0.0%)                   | 0 (0.0%)                   |
| Homemaker                       | 0 (0.0%)             | 4 (50.0%)                      | 1 (16.7%)          | 0 (0.0%)                   | 8 (80.0%)                  |
| Missing                         | 0 (0.0%)             | 0 (0.0%)                       | 0 (0.0%)           | 0 (0.0%)                   | 1 (10.0%)                  |
